# Supplementary material for: Ultrafast, superhigh gain visible-blind UV detector and optical logic gates based on nonpolar a-axial GaN nanowire
Source: Royal Society of Chemistry journal article supplement (doi:10.1039/c4nr03581j), 2014-08-05
Supplement: c4nr03581j1.pdf [file c4nr03581j1.pdf]

## Supplementary Information for

### **Ultrafast, superhigh sensitivity visible-blind UV detector and optical logic gates based on nonpolar a-axial GaN nanowire**

Xingfu Wang<sup>a</sup>, Yong Zhang<sup>a</sup>, Xinman Chen<sup>a</sup>, Miao He<sup>a</sup>, Chao Liu<sup>a</sup>, Yian Yin<sup>a</sup>, Xianshao Zou<sup>a</sup>, and Shuti Li<sup>\*a</sup>

<sup>a</sup>Laboratory of Nanophotonic Functional Materials and Devices, Institute of Opto-Electronic Materials and Technology, South China Normal University, Guangzhou, 510631, People's Republic of China

\*E-mail: [lishuti@scnu.edu.cn](mailto:lishuti@scnu.edu.cn).

### **Index**

Figures S1-S3

Supplementary Discussion: the transport characterization of MSM GaN NW PD.

**Figure S1**

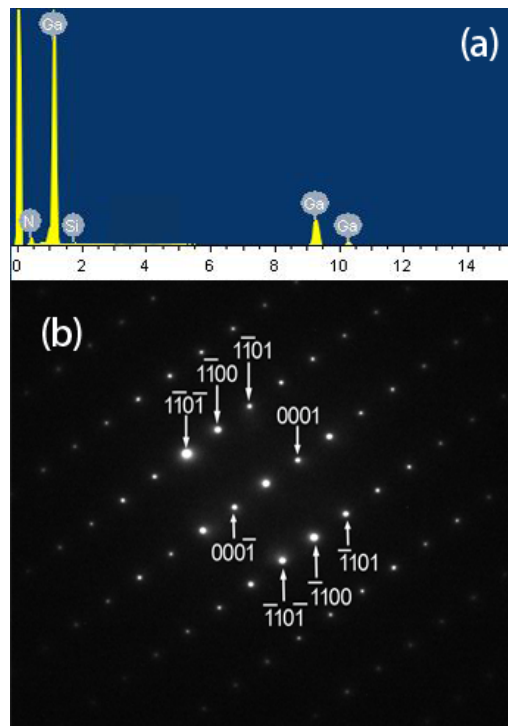

**Figure S1.** (a) EDS data of a single GaN NW grown on patterned Si; (b) the electron diffraction data with the electron beam perpendicular to the axis of a typical GaN NW.

Figure S2

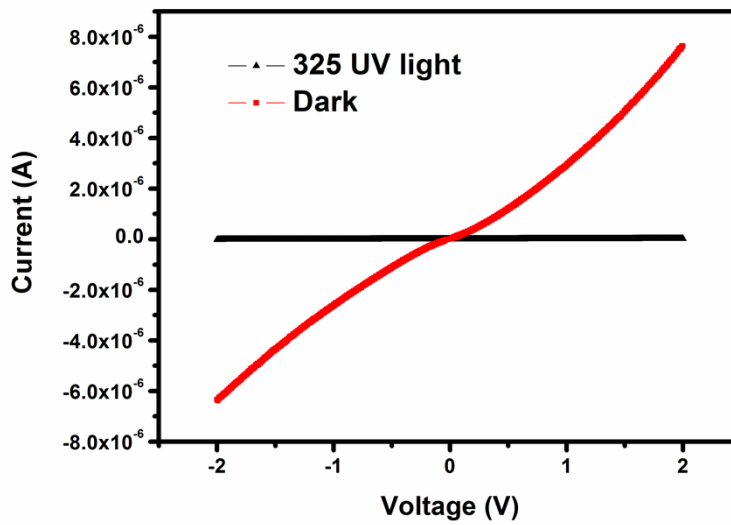

Figure S2a. typical linear scale I-V characteristics of the fabricated GaN NW PD both in the dark (black curve) and upon 325 nm UV light illumination with power density of 1 mW/cm<sup>2</sup> (red curve).

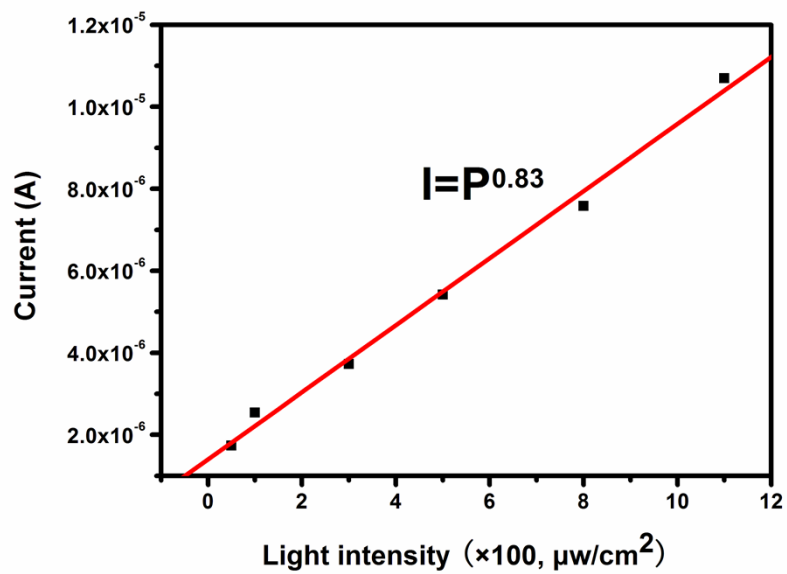

Figure S2b. light density dependent photocurrent curve at a voltage of 1 V

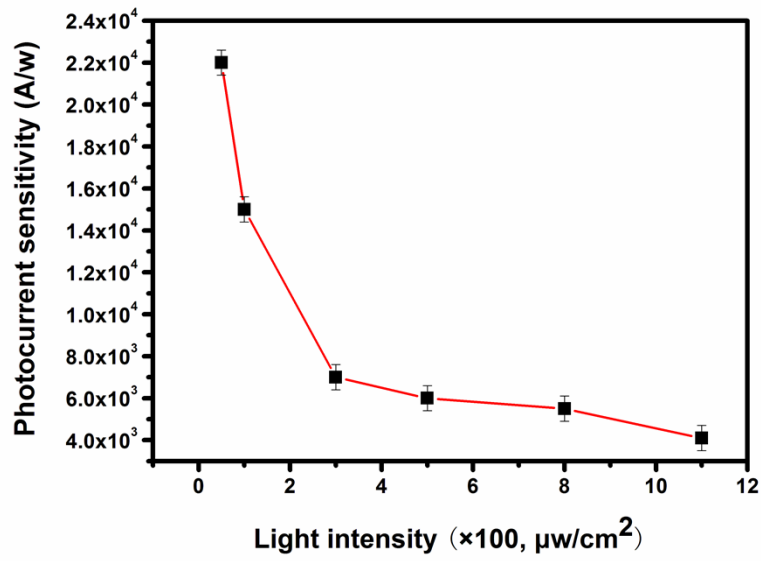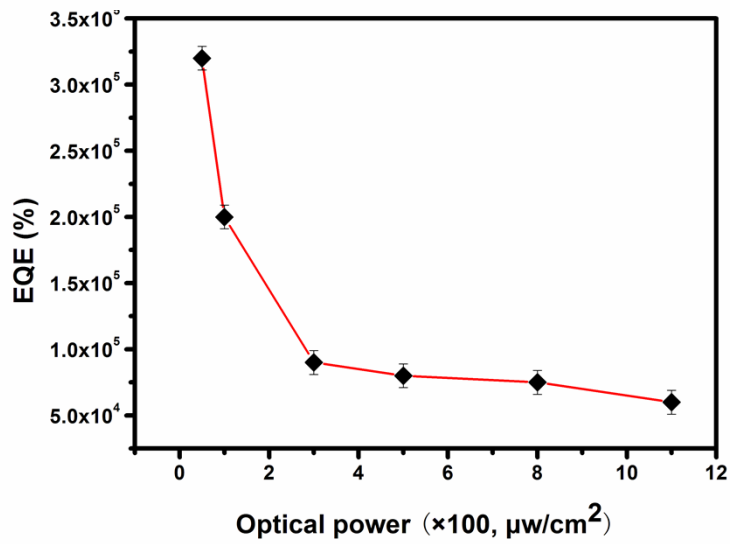

Figure S2c and d. the light density dependent spectra responsivity ( $R_\lambda$ ) at a voltage of 1V

(c). the light density dependent external quantum efficiency (EQE) at a voltage of 1 V (d).

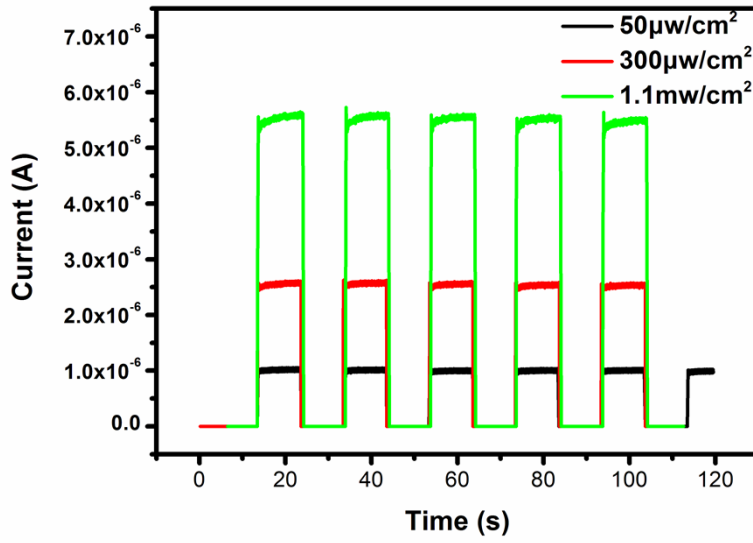

**Figure S2e.** Time dependent photocurrent response of the GaN PD device in the light density of 50, 300 and 1100  $\mu\text{w}/\text{cm}^2$  when the UV light turned on and off with a period of  $\sim 10$  s (at a bias of 1 V).

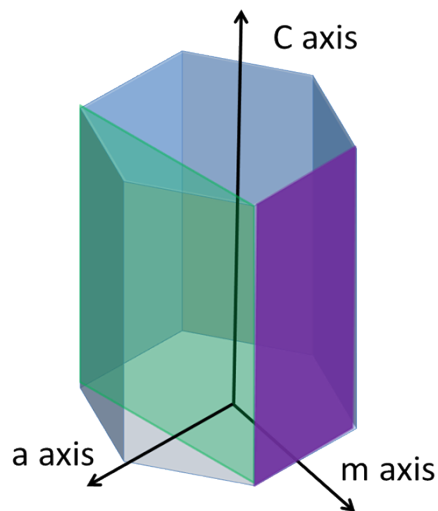

**Figure S3.** schematic diagram of polar (c-axis) and non-polar (m and a axis) crystal orientation in wurtzite structure GaN.

## Supplementary Discussion:

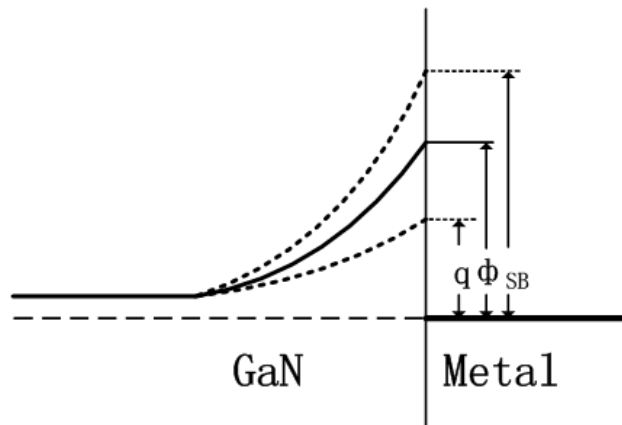

**Figure S4.** the energy-band diagram for the Schottky barrier that is formed at the metal-GaN interface.

The back-to-back MSM GaN NW PD can be regarded as a nanowire connected with a forward-biased SB diode and a reverse-biased SB diode in series. **Fig. 3d** in the main text shows the energy-band diagram for the GaN NW PD device. The reverse biased SB height ( $\Phi_R$ ) is much higher than that of forward biased ( $\Phi_F$ ). The reverse biased Schottky contact area is the bottleneck for the current transport in the device. **Fig.S3** shows the energy-band diagram for the Schottky barrier that is formed at the metal-GaN interface. The original SB height  $\Phi_{SB}$  is determined by the work-function difference between the metal and GaN, and the interface states. As for the forward-biased SB diode, the current passing through this barrier can be described by the thermionic-emission (TE) theory. The total current density is given by:<sup>1,2</sup>

$$\begin{aligned}
J_n &= \left[ A^* T^2 \exp\left(-\frac{q\phi_{SB}}{kT}\right) \right] \left[ \exp\left(\frac{qV}{kT} - 1\right) \right] \\
&= J_{TE} \left[ \exp\left(\frac{qV}{kT} - 1\right) \right]
\end{aligned} \tag{1}$$

Therefore,

$$I_{TE} = SA^* T^2 \exp\left(-\frac{q\phi_{SB}}{kT}\right) \tag{2}$$

and

$$A^* = \frac{4\pi q m^* k^2}{h^3} \tag{3}$$

in which S is the area of the Schottky contact,  $A^*$  is the effective Richardson constant, T is the temperature, q is the unit electronic charge, k is the Boltzmann constant, and V is the applied voltage. And for the reverse-biased SB diode, the current can be described by the thermionic-emission-diffusion theory (for  $V \gg 3kT/q \sim 77 \text{ mV}$ ) as:<sup>1, 2</sup>

$$I_{TED} = SA^{**} T^2 \exp\left(-\frac{q\phi_{SB}}{kT}\right) \exp\left(\frac{\sqrt[4]{q^7 N_D (V + V_{bi} - kT/q)} 8\pi^2 \xi_s^3}{kT}\right) \tag{4}$$

and

$$V_{bi} = \Phi_{SB} - (E_C - E_F) \tag{5}$$

in which  $A^{**}$  is the effective Richardson constant,  $N_D$  is the donor impurity density,  $V_{bi}$  is the built-in potential, and  $\epsilon_s$  is the permittivity of GaN. The depletion layer formed at the SB area has a width of:

$$W_D = \sqrt{\frac{2\xi_s}{qN_D} \left( V_{bi} - V - \frac{kT}{q} \right)} \quad (6)$$

Considering Equation 2 , 4 , and 6 we can conclude that the current passing through the Schottky contact is very sensitive to the Schottky barrier height and barrier width, especially under reverse-bias conditions. Therefore, the photocurrent transport characteristics of the M-S-M structure-based PD devices are mainly dictated by the reverse biased Schottky diode.

## Reference

1. Hu, Y. F.; Zhou, J.; Yeh, P. H.; Li, Z.; Wei, T. Y.; Wang, Z. L. Supersensitive, Fast-Response Nanowire Sensors by Using Schottky Contacts. *Adv Mater* 2010, **22**, 3327-3332.
2. Sze, S. M. *Physics of Semiconductor Devices*. Wiley, : New York, NY, 1981.
